# Supplementary material for: Synthesis and application of a highly selective molecularly imprinted adsorbent based on multi-walled carbon nanotubes for selective removal of perfluorooctanoic acid
Source: Royal Society of Chemistry journal article supplement (doi:10.1039/c7ew00443e), 2018-01-01
Supplement: c7ew00443e1.pdf [file c7ew00443e1.pdf]

## Supplementary Information (SI)

### Synthesis and application of a highly selective molecularly imprinted adsorbent based on multi-walled carbon nanotubes for selective removal of perfluorooctanoic acid

Fengmei Cao<sup>a,b</sup>, Lei Wang<sup>b</sup>, Yiming Yao<sup>b</sup>, Fengchang Wu<sup>a</sup>, Hongwen Sun<sup>b,\*</sup>, and Shaoyong Lu<sup>a,\*</sup>

a, Chinese Research Academy of Environmental Science, State Key Laboratory of Environmental Criteria and Risk Assessment, State Environmental Protection Key Laboratory for Lake Pollution Control, Beijing 100012, China.

b, Ministry of Education Key Laboratory of Pollution Processes and Environmental Criteria, Tianjin Key Laboratory of Environmental Remediation and Pollution Control, College of Environmental Science and Engineering, Nankai University, Tianjin 300071, China

#### Correspondence to:

Hongwen Sun: sunhongwen@nankai.edu.cn, 86022-66229241, Tongyan Road 38#, Haihe Education Park, Jinnan District, Tianjin, 300350, China

Shaoyong Lu: lusy@craes.org.cn, 86010-84935064, Dayangfang Beiyuan Road, 8#, Chaoyang District, Beijing, 100012, China.

### Content catalogue

|                                                                                                        |   |
|--------------------------------------------------------------------------------------------------------|---|
| Characterization .....                                                                                 | 1 |
| Table S1 The surface area and pore size distribution of the MWCNTs and MWCNTs@MIPs (NIPs) ..           | 2 |
| Fig. S1 Zeta potentials of MWCNTs@MIPs and MWCNTs@NIPs. ....                                           | 3 |
| Fig. S2 The adsorption of PFOA onto MWCNTs@MIPs at the presence of Mg <sup>2+</sup> , HA and phenol .. | 4 |
| References.....                                                                                        | 5 |

1 **Characterization**

2 The methods for characterization of specific surface area and  $\zeta$  potentials were performed based  
3 on our previous study , and 3 repeat testing for specific surface area have been done[1,2]. The data  
4 presented in our study were described as the average  $\pm$  standard error. The average specific surface area  
5 of MWCNTs, MWCNTs@MIPs and MWCNTs@NIPs were 101.2, 82.4 and 78.5 m<sup>2</sup>/g, respectively.  
6 The average pore diameters for these three nanoparticles were similar at about 40 nm, with which the  
7 pore size distributions concentrate in the mesopores (2-50 nm in size).

8 The zeta potentials of MWCNTs@MIPs and MWCNTs@NIPs decreased with increasing of the  
9 solution pH (Fig. S1). The isoelectric points (IEPs) of the MWCNTs@MIPs and MWCNTs@NIPs  
10 were found to be 4.21 and 3.62, respectively. The polymers are positively charged at pH values below  
11 the IEP and negatively charged above this point.

Table S1 The surface area and pore size distribution of the MWCNTs and MWCNTs@MIPs (NIPs).

| Sorbents    | Surface area (m <sup>2</sup> /g) | Pore volume (cm <sup>3</sup> /g) | Average pore diameter (nm) |
|-------------|----------------------------------|----------------------------------|----------------------------|
| MWCNTs      | 101.2±2.51                       | 0.215±0.005                      | 40.82±0.730                |
| MWCNTs@MIPs | 82.4±0.590                       | 0.132±0.002                      | 40.28±0.084                |
| MWCNTs@NIPs | 78.5±0.928                       | 0.121±0.003                      | 36.267±0.368               |

Fig. S1 Zeta potentials of MWCNTs@MIPs and MWCNTs@NIPs.

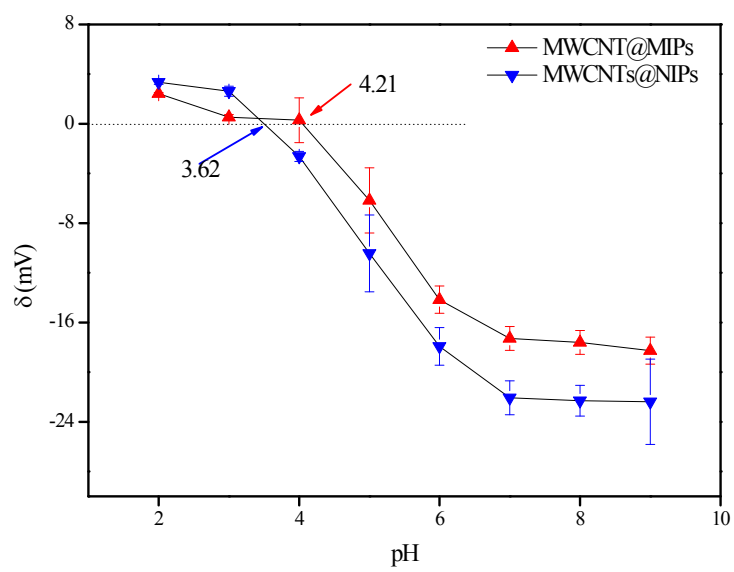

Fig. S 2 The adsorption of PFOA onto MWCTS@MIPs at the presence of  $Mg^{2+}$ , HA and phenol

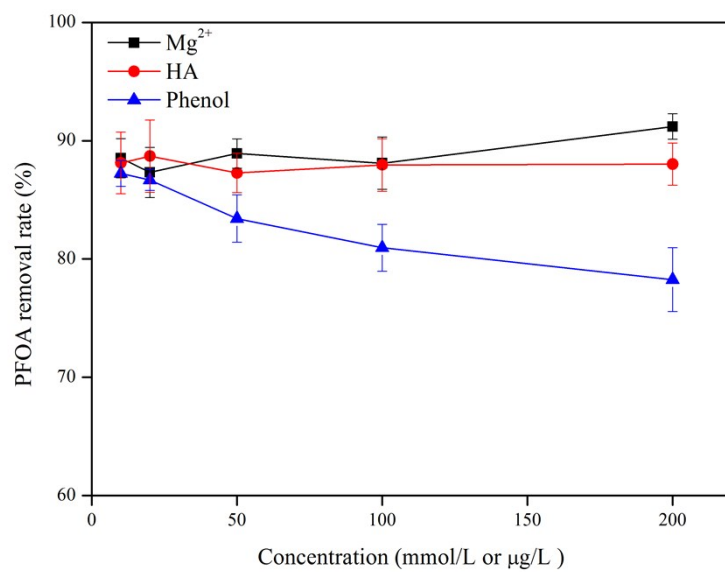

## References

- [1] F. Cao, L. Wang, Y. Tian, F. Wu, C. Deng, Q. Guo, H. Sun, S. Lu, Synthesis and evaluation of molecularly imprinted polymers with binary functional monomers for the selective removal of perfluorooctanesulfonic acid and perfluorooctanoic acid, *Journal of Chromatography A*, 1516 (2017) 42-53.
- [2] F. Cao, L. Wang, X. Ren, H. Sun, Synthesis of a perfluorooctanoic acid molecularly imprinted polymer for the selective removal of perfluorooctanoic acid in an aqueous environment, *Journal of Applied Polymer Science*, 133 (2016).
